# Supplementary figures and images for: Unexpected photoinduced electron transfer reactions of two glucose thiobenzoates †
Source: Royal Society of Chemistry journal article supplement (doi:10.1039/b000455n), 2000-01-01

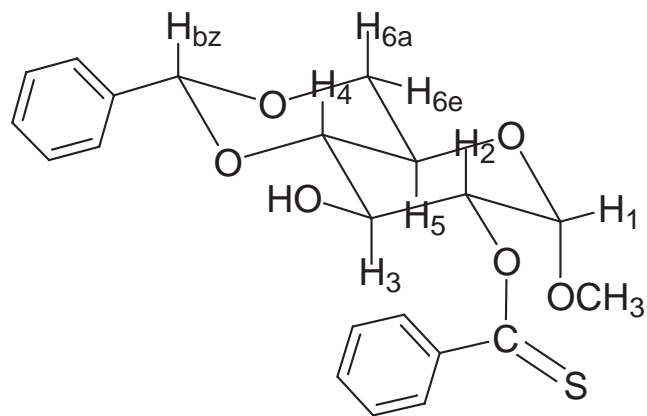

2

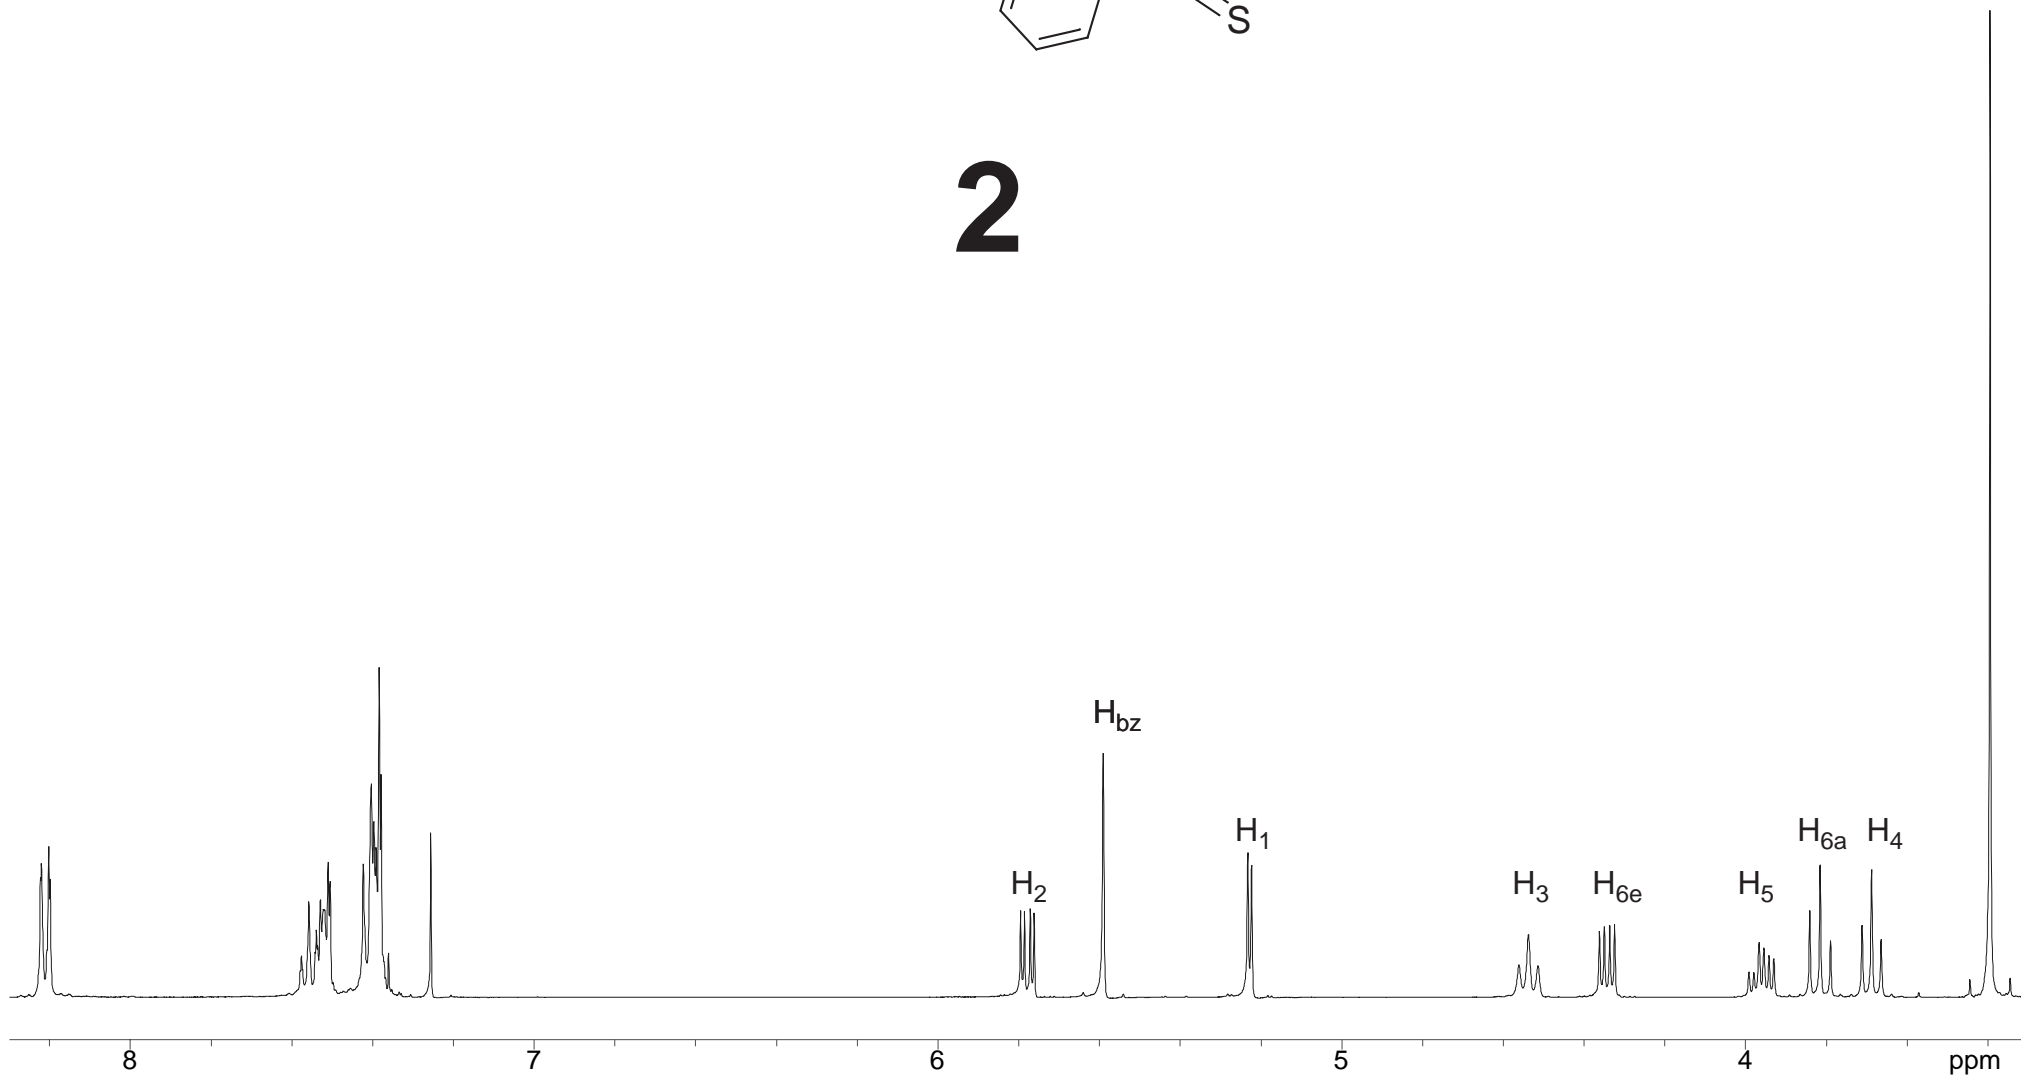

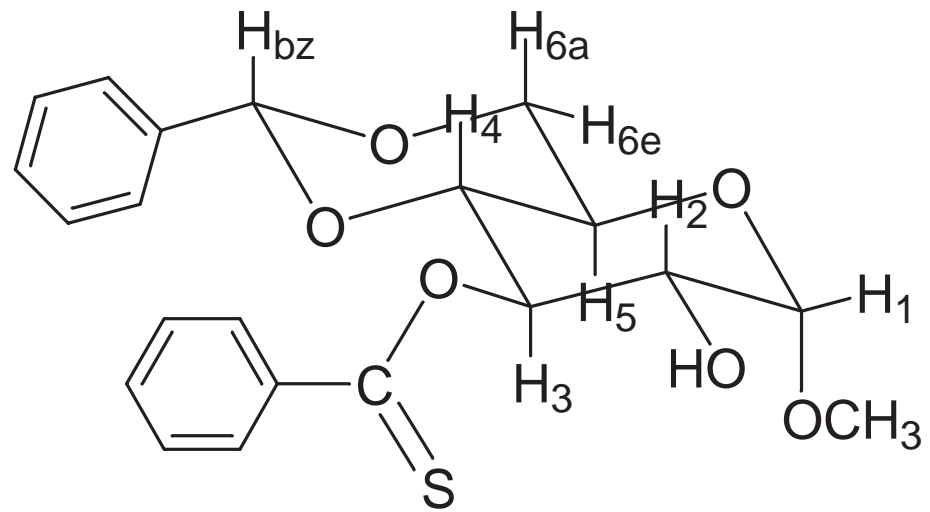

**3**

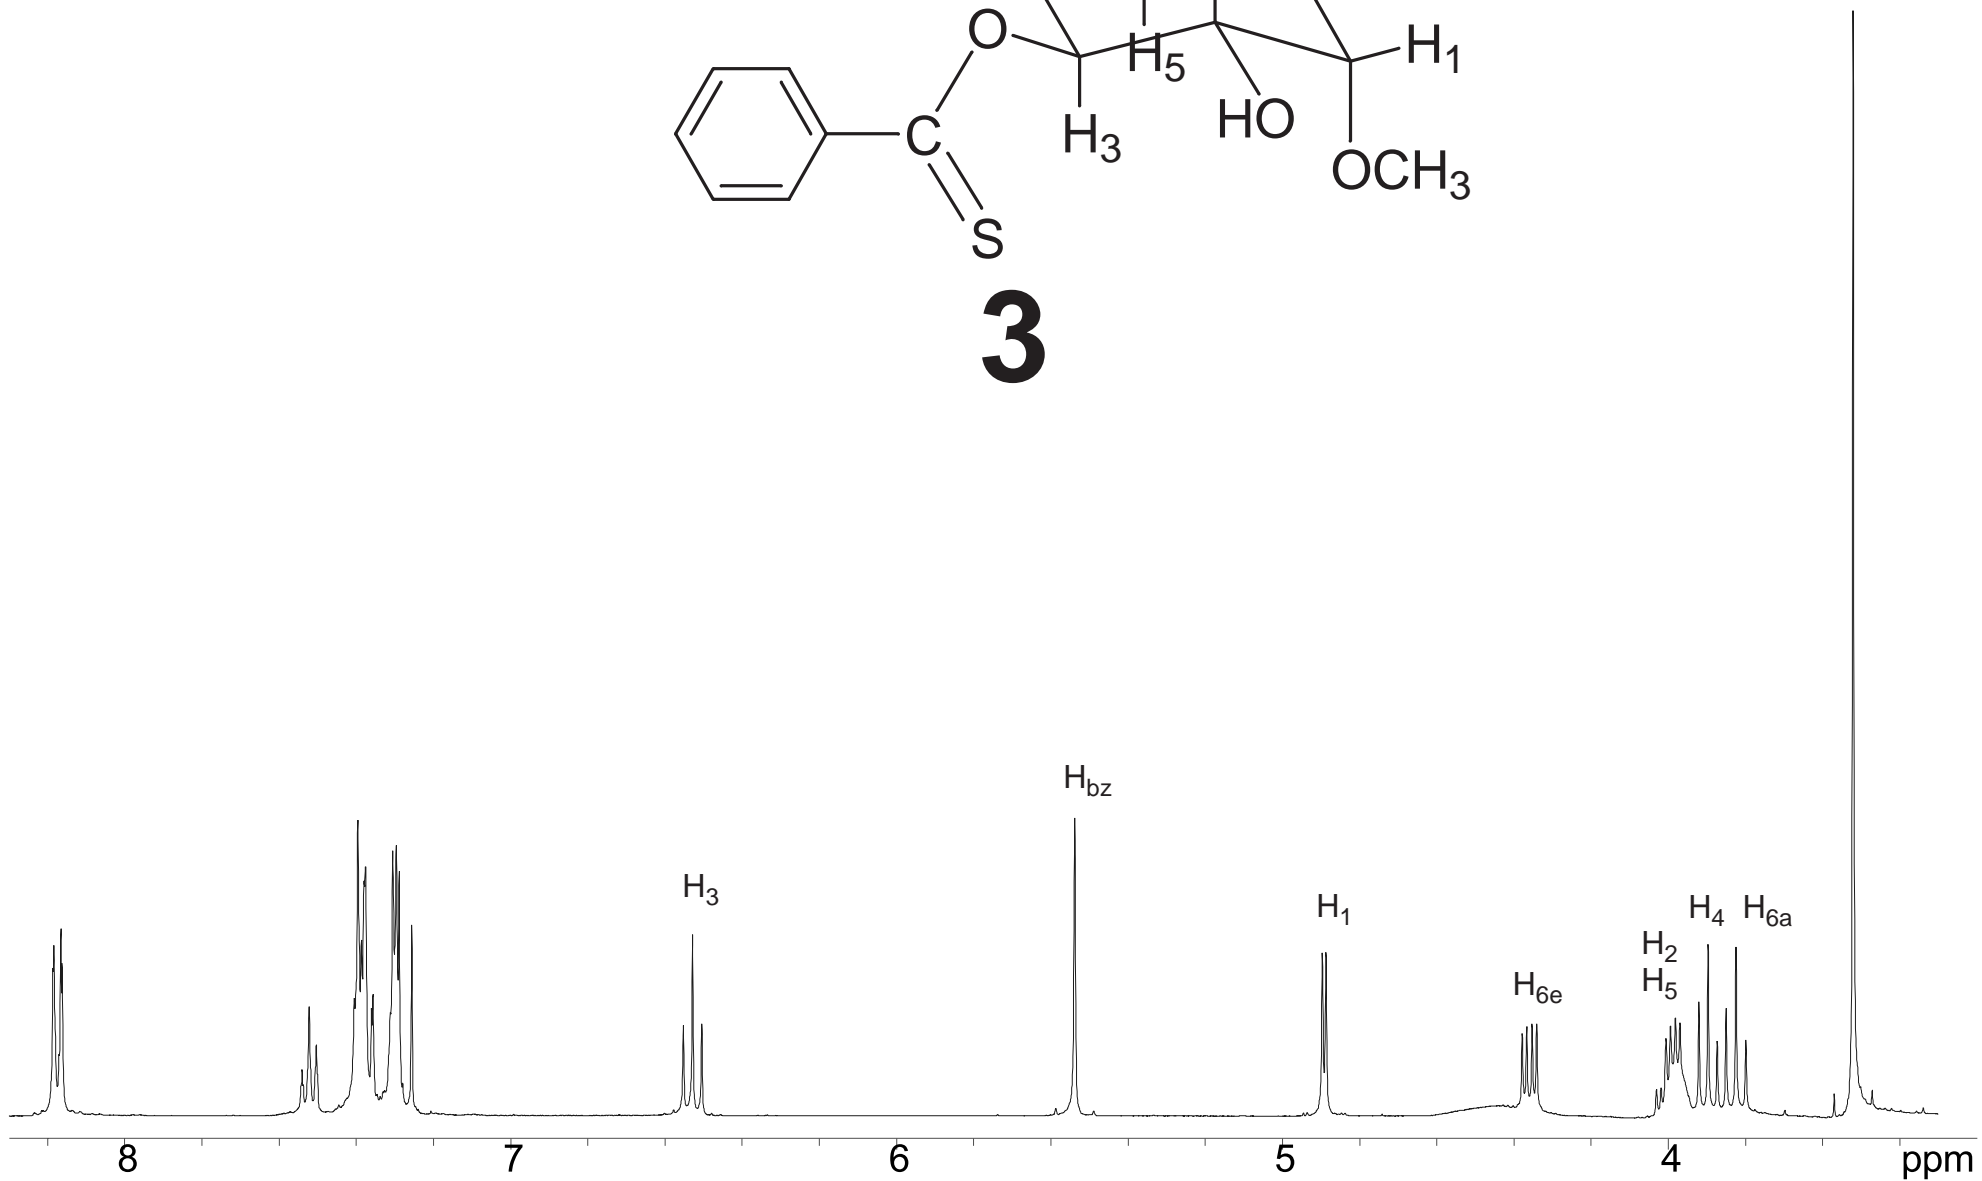

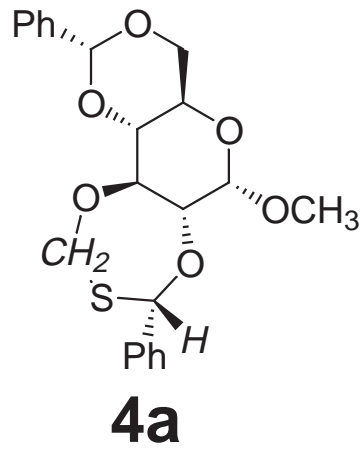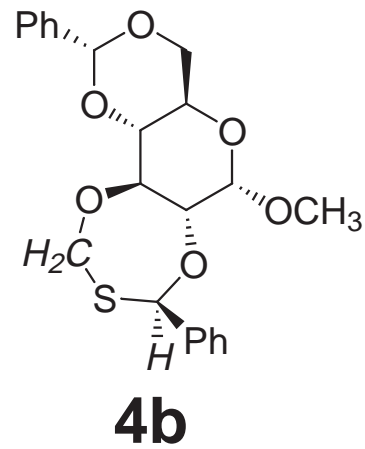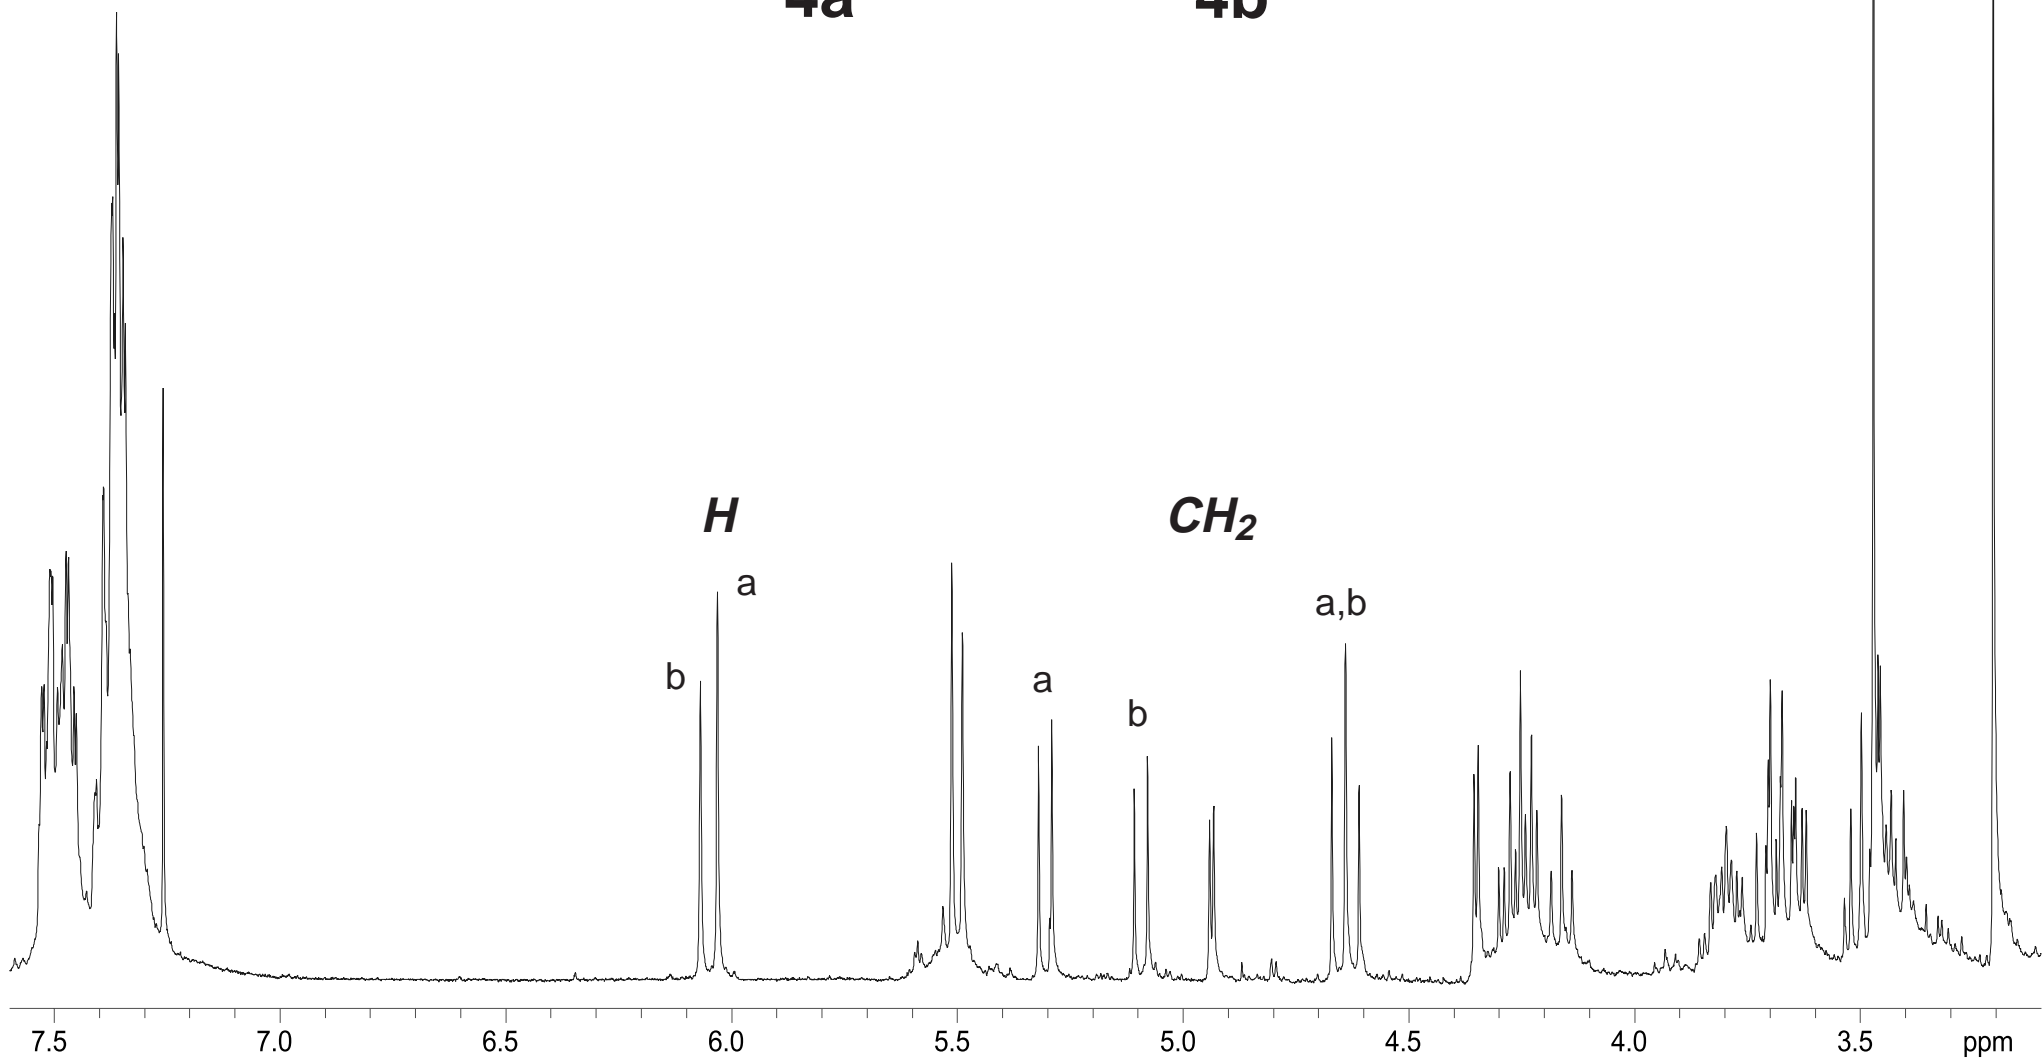

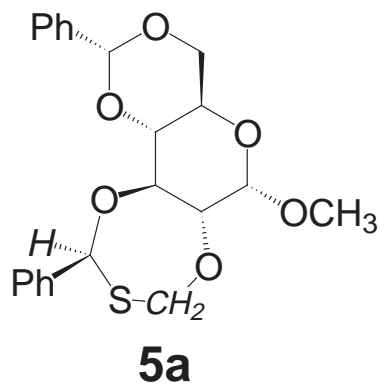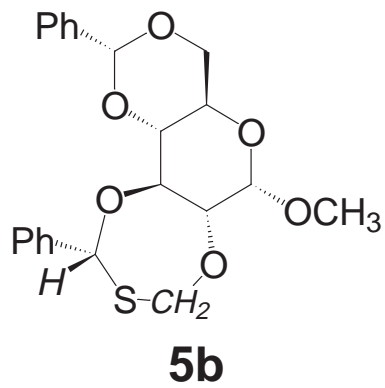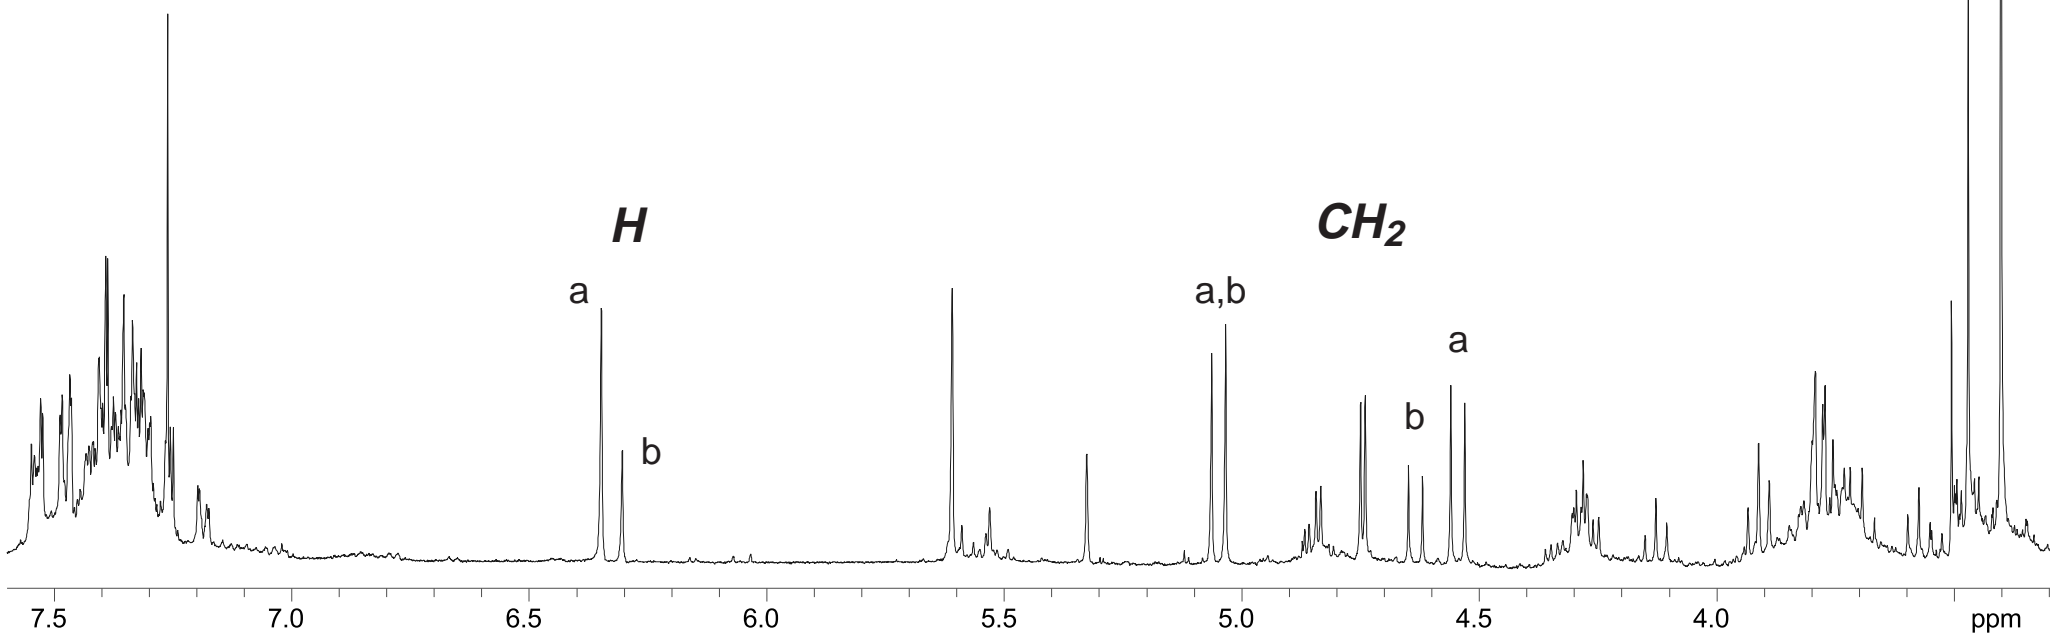

Supplement: b000455n.pdf [file b000455n.pdf]
